# Supplementary material for: Sphingomonas and Phenylobacterium as Major Microbiota in Thymic Epithelial Tumors
Source: MDPI journal article supplement (doi:10.3390/jpm11111092), 2021-10-26
Supplement: s1 [file s1]

Supplementary Figure 3.

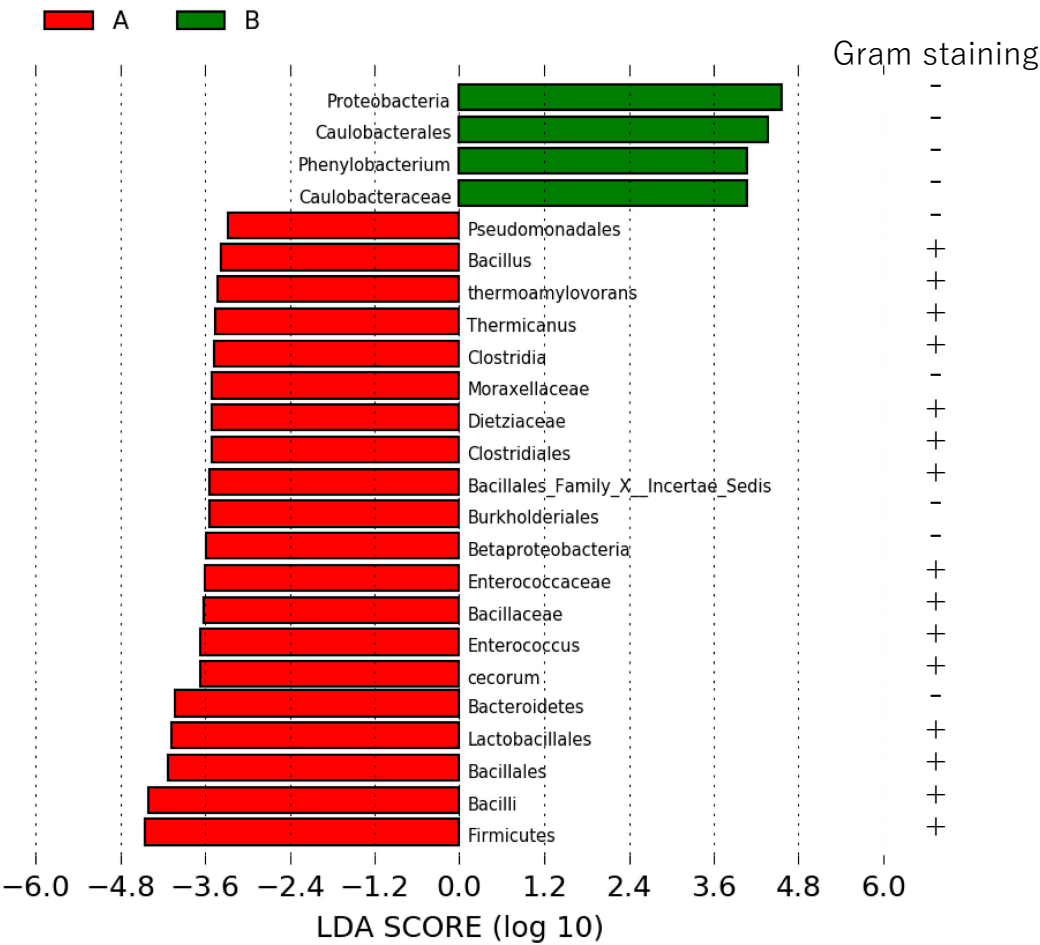

LEfSe analysis between Type A and B histology. This figure presents taxa detected when the *P*-value from the Kruskal-Wallis test for relative abundance between type A and B histology groups was increased from 0.05 to 0.1. Dominant taxa are indicated in red for Type A histology and in green for Type B histology.
