# Supplementary material for: Sphingomonas and Phenylobacterium as Major Microbiota in Thymic Epithelial Tumors
Source: MDPI journal article supplement (doi:10.3390/jpm11111092), 2021-10-26
Supplement: s1 [file s1]

**Supplementary Table 2. Read depth of the sequencing.**

| Case No. | Phylum         | Class                 | Order              | Family                       | Genus                  | Species               | Read depth |
|----------|----------------|-----------------------|--------------------|------------------------------|------------------------|-----------------------|------------|
| 1        | Actinobacteria | Actinobacteria        | Actinomycetales    | Corynebacteriaceae           | Corynebacterium        | (slash calls)         | 359        |
| 1        | Actinobacteria | Actinobacteria        | Actinomycetales    | Nocardioidaceae              | Nocardioides           | (genus level ID only) | 13         |
| 1        | Actinobacteria | Actinobacteria        | Actinomycetales    | Promicromonosporaceae        | Isopterocola           | (genus level ID only) | 34         |
| 1        | Actinobacteria | Actinobacteria        | Bifidobacteriales  | Bifidobacteriaceae           | Bifidobacterium        | (slash calls)         | 52         |
| 1        | Bacteroidetes  | Flavobacteria         | Flavobacteriales   | Flavobacteriaceae            | Chryseobacterium       | (genus level ID only) | 38         |
| 1        | Bacteroidetes  | Flavobacteria         | Flavobacteriales   | Flavobacteriaceae            | Cloacibacterium        | (slash calls)         | 399        |
| 1        | Bacteroidetes  | Sphingobacteriia      | Sphingobacteriales | Saprospiraceae               | (family level ID only) |                       | 44         |
| 1        | Firmicutes     | Bacilli               | Bacillales         | Bacillaceae                  | Bacillus               | (slash calls)         | 17         |
| 1        | Firmicutes     | Bacilli               | Bacillales         | Bacillaceae                  | Bacillus               | thermoamylovorans     | 22         |
| 1        | Firmicutes     | Bacilli               | Bacillales         | Bacillaceae                  | Geobacillus            | stearothermophilus    | 74         |
| 1        | Firmicutes     | Bacilli               | Bacillales         | Bacillales Family X          | Thermicanus            | (genus level ID only) | 92         |
| 1        | Firmicutes     | Bacilli               | Lactobacillales    | Enterococcaceae              | Enterococcus           | cecorum               | 194        |
| 1        | Firmicutes     | Clostridia            | Clostridiales      | Clostridiaceae               | (slash calls)          |                       | 131        |
| 1        | Proteobacteria | Alphaproteobacteria   | Caulobacterales    | Caulobacteraceae             | Phenyllobacterium      | (genus level ID only) | 331        |
| 1        | Proteobacteria | Alphaproteobacteria   | Rhizobiales        | Bradyrhizobiaceae            | (slash calls)          |                       | 76         |
| 1        | Proteobacteria | Alphaproteobacteria   | Rhizobiales        | Methylobacteriaceae          | Methylobacterium       | (slash calls)         | 49         |
| 1        | Proteobacteria | Alphaproteobacteria   | Rhizobiales        | Phyllobacteriaceae           | Phyllobacterium        | (slash calls)         | 69         |
| 1        | Proteobacteria | Alphaproteobacteria   | Sphingomonadales   | Sphingomonadaceae            | Sphingomonas           | (slash calls)         | 1420       |
| 1        | Proteobacteria | Betaproteobacteria    | Burkholderiales    | unclassified Burkholderiales | Tepidimonas            | fonticaldi            | 11         |
| 1        | Proteobacteria | Gammaproteobacteria   | Pseudomonadales    | Moraxellaceae                | Acinetobacter          | radioresistens        | 24         |
| 2        | Bacteroidetes  | Flavobacteria         | Flavobacteriales   | Flavobacteriaceae            | Cloacibacterium        | (slash calls)         | 12         |
| 2        | Cyanobacteria  | Oscillatoriothycideae | Oscillatoriales    | Phormidiaceae                | (family level ID only) |                       | 52         |
| 2        | Firmicutes     | Bacilli               | Bacillales         | Bacillaceae                  | Anoxybacillus          | (slash calls)         | 28         |
| 2        | Firmicutes     | Bacilli               | Bacillales         | Bacillaceae                  | Bacillus               | thermoamylovorans     | 18         |
| 2        | Firmicutes     | Bacilli               | Bacillales         | Bacillales Family X          | Thermicanus            | (genus level ID only) | 12         |
| 2        | Firmicutes     | Bacilli               | Lactobacillales    | Enterococcaceae              | Enterococcus           | cecorum               | 35         |
| 2        | Proteobacteria | Alphaproteobacteria   | Caulobacterales    | Caulobacteraceae             | Phenyllobacterium      | (genus level ID only) | 133        |
| 2        | Proteobacteria | Alphaproteobacteria   | Rhizobiales        | Bradyrhizobiaceae            | (slash calls)          |                       | 17         |
| 2        | Proteobacteria | Alphaproteobacteria   | Rhizobiales        | Phyllobacteriaceae           | Phyllobacterium        | (slash calls)         | 19         |
| 2        | Proteobacteria | Alphaproteobacteria   | Sphingomonadales   | Sphingomonadaceae            | Sphingomonas           | (slash calls)         | 334        |
| 2        | Actinobacteria | Actinobacteria        | Actinomycetales    | Corynebacteriaceae           | Corynebacterium        | (slash calls)         | 10         |
| 3        | Actinobacteria | Actinobacteria        | Actinomycetales    | Corynebacteriaceae           | Corynebacterium        | jeikeium              | 30         |
| 3        | Actinobacteria | Actinobacteria        | Actinomycetales    | Corynebacteriaceae           | Corynebacterium        | tuberculostearicum    | 10         |
| 3        | Actinobacteria | Actinobacteria        | Actinomycetales    | Dietziaceae                  | (family level ID only) |                       | 31         |
| 3        | Cyanobacteria  | Oscillatoriothycideae | Oscillatoriales    | Phormidiaceae                | (family level ID only) |                       | 95         |
| 3        | Firmicutes     | Bacilli               | Bacillales         | Staphylococcaceae            | Staphylococcus         | (slash calls)         | 37         |
| 3        | Firmicutes     | Bacilli               | Lactobacillales    | Streptococcaceae             | Streptococcus          | (slash calls)         | 42         |
| 3        | Proteobacteria | Alphaproteobacteria   | Caulobacterales    | Caulobacteraceae             | (family level ID only) |                       | 36         |
| 3        | Proteobacteria | Alphaproteobacteria   | Caulobacterales    | Caulobacteraceae             | Phenyllobacterium      | (genus level ID only) | 910        |
| 3        | Proteobacteria | Alphaproteobacteria   | Rhizobiales        | Bradyrhizobiaceae            | (slash calls)          |                       | 243        |
| 3        | Proteobacteria | Alphaproteobacteria   | Rhizobiales        | Methylobacteriaceae          | Methylobacterium       | (slash calls)         | 104        |
| 3        | Proteobacteria | Alphaproteobacteria   | Rhizobiales        | Phyllobacteriaceae           | Phyllobacterium        | (slash calls)         | 134        |
| 3        | Proteobacteria | Alphaproteobacteria   | Sphingomonadales   | Sphingomonadaceae            | Sphingomonas           | (slash calls)         | 2422       |
| 3        | Proteobacteria | Gammaproteobacteria   | Xanthomonadales    | Xanthomonadaceae             | (slash calls)          |                       | 14         |
| 3        | Proteobacteria | Gammaproteobacteria   | Xanthomonadales    | Xanthomonadaceae             | Pseudoxanthomonas      | sp.                   | 32         |
| 4        | Proteobacteria | Alphaproteobacteria   | Caulobacterales    | Caulobacteraceae             | Phenyllobacterium      | (genus level ID only) | 175        |
| 4        | Proteobacteria | Alphaproteobacteria   | Rhizobiales        | Bradyrhizobiaceae            | (slash calls)          |                       | 40         |
| 4        | Proteobacteria | Alphaproteobacteria   | Rhizobiales        | Phyllobacteriaceae           | Phyllobacterium        | (slash calls)         | 11         |
| 4        | Proteobacteria | Alphaproteobacteria   | Sphingomonadales   | Sphingomonadaceae            | Sphingomonas           | (slash calls)         | 523        |
| 5        | Firmicutes     | Clostridia            | Clostridiales      | Clostridiales Family XI      | Finexgoldia            | magna                 | 10         |
| 5        | Proteobacteria | Alphaproteobacteria   | Caulobacterales    | Caulobacteraceae             | Phenyllobacterium      | (genus level ID only) | 345        |
| 5        | Proteobacteria | Alphaproteobacteria   | Rhizobiales        | Bradyrhizobiaceae            | (slash calls)          |                       | 92         |
| 5        | Proteobacteria | Alphaproteobacteria   | Rhizobiales        | Methylobacteriaceae          | Methylobacterium       | (slash calls)         | 12         |
| 5        | Proteobacteria | Alphaproteobacteria   | Rhizobiales        | Phyllobacteriaceae           | Phyllobacterium        | (slash calls)         | 35         |
| 5        | Proteobacteria | Alphaproteobacteria   | Sphingomonadales   | Sphingomonadaceae            | Sphingomonas           | (slash calls)         | 1197       |
| 5        | Proteobacteria | Gammaproteobacteria   | Pasteurellales     | Pasteurellaceae              | Haemophilus            | parainfluenzae        | 19         |
| 5        | Proteobacteria | Gammaproteobacteria   | Pseudomonadales    | Moraxellaceae                | (slash calls)          |                       | 27         |
| 5        | Proteobacteria | Gammaproteobacteria   | Salinisphaerales   | Salinisphaeraceae            | (family level ID only) |                       | 13         |
| 6        | Proteobacteria | Alphaproteobacteria   | Caulobacterales    | Caulobacteraceae             | Phenyllobacterium      | (genus level ID only) | 113        |
| 6        | Proteobacteria | Alphaproteobacteria   | Rhizobiales        | Bradyrhizobiaceae            | (slash calls)          |                       | 34         |
| 6        | Proteobacteria | Alphaproteobacteria   | Rhizobiales        | Phyllobacteriaceae           | Phyllobacterium        | (slash calls)         | 19         |
| 6        | Proteobacteria | Alphaproteobacteria   | Sphingomonadales   | Sphingomonadaceae            | Sphingomonas           | (slash calls)         | 325        |
| 7        | Actinobacteria | Actinobacteria        | Actinomycetales    | Dietziaceae                  | (family level ID only) |                       | 63         |
| 7        | Firmicutes     | Bacilli               | Bacillales         | Staphylococcaceae            | Staphylococcus         | (slash calls)         | 49         |
| 7        | Firmicutes     | Bacilli               | Lactobacillales    | Streptococcaceae             | Streptococcus          | (slash calls)         | 206        |
| 7        | Fusobacteria   | Fusobacteriia         | Fusobacteriales    | Fusobacteriaceae             | (slash calls)          |                       | 13         |
| 7        | Proteobacteria | Alphaproteobacteria   | Caulobacterales    | Caulobacteraceae             | (family level ID only) |                       | 79         |
| 7        | Proteobacteria | Alphaproteobacteria   | Caulobacterales    | Caulobacteraceae             | Phenyllobacterium      | (genus level ID only) | 2133       |
| 7        | Proteobacteria | Alphaproteobacteria   | Rhizobiales        | Bradyrhizobiaceae            | (slash calls)          |                       | 501        |
| 7        | Proteobacteria | Alphaproteobacteria   | Rhizobiales        | Methylobacteriaceae          | Methylobacterium       | (slash calls)         | 38         |
| 7        | Proteobacteria | Alphaproteobacteria   | Rhizobiales        | Phyllobacteriaceae           | Phyllobacterium        | (slash calls)         | 229        |
| 7        | Proteobacteria | Alphaproteobacteria   | Sphingomonadales   | Sphingomonadaceae            | Sphingomonas           | (slash calls)         | 5313       |
| 7        | Proteobacteria | Betaproteobacteria    | Burkholderiales    | Burkholderiaceae             | Burkholderia           | multivorans           | 12         |
| 7        | Proteobacteria | Betaproteobacteria    | Neisseriales       | Neisseriaceae                | (family level ID only) |                       | 33         |
| 7        | Proteobacteria | Betaproteobacteria    | Rhodocyclales      | Rhodocyclaceae               | Methyloversatilis      | universalis           | 17         |
| 7        | Proteobacteria | Gammaproteobacteria   | Pseudomonadales    | Moraxellaceae                | Acinetobacter          | ursingii              | 14         |

|    |                |                     |                  |                           |                        |                       |      |
|----|----------------|---------------------|------------------|---------------------------|------------------------|-----------------------|------|
| 8  | Proteobacteria | Alphaproteobacteria | Caulobacterales  | Caulobacteraceae          | Phenyllobacterium      | (genus level ID only) | 423  |
| 8  | Proteobacteria | Alphaproteobacteria | Rhizobiales      | Bradyrhizobiaceae         | (slash calls)          |                       | 105  |
| 8  | Proteobacteria | Alphaproteobacteria | Rhizobiales      | Methylobacteriaceae       | Methylobacterium       | (slash calls)         | 12   |
| 8  | Proteobacteria | Alphaproteobacteria | Rhizobiales      | Phyllobacteriaceae        | Phyllobacterium        | (slash calls)         | 46   |
| 8  | Proteobacteria | Alphaproteobacteria | Sphingomonadales | Sphingomonadaceae         | Sphingomonas           | (slash calls)         | 886  |
| 9  | Proteobacteria | Alphaproteobacteria | Caulobacterales  | Caulobacteraceae          | Phenyllobacterium      | (genus level ID only) | 354  |
| 9  | Proteobacteria | Alphaproteobacteria | Rhizobiales      | Bradyrhizobiaceae         | (slash calls)          |                       | 138  |
| 9  | Proteobacteria | Alphaproteobacteria | Rhizobiales      | Phyllobacteriaceae        | Phyllobacterium        | (slash calls)         | 38   |
| 9  | Proteobacteria | Alphaproteobacteria | Sphingomonadales | Sphingomonadaceae         | Sphingomonas           | (slash calls)         | 855  |
| 10 | Proteobacteria | Alphaproteobacteria | Caulobacterales  | Caulobacteraceae          | (family level ID only) |                       | 20   |
| 10 | Proteobacteria | Alphaproteobacteria | Caulobacterales  | Caulobacteraceae          | Phenyllobacterium      | (genus level ID only) | 1212 |
| 10 | Proteobacteria | Alphaproteobacteria | Rhizobiales      | Bradyrhizobiaceae         | (slash calls)          |                       | 109  |
| 10 | Proteobacteria | Alphaproteobacteria | Rhizobiales      | Methylobacteriaceae       | Methylobacterium       | (slash calls)         | 11   |
| 10 | Proteobacteria | Alphaproteobacteria | Rhizobiales      | Phyllobacteriaceae        | Phyllobacterium        | (slash calls)         | 96   |
| 10 | Proteobacteria | Alphaproteobacteria | Sphingomonadales | Sphingomonadaceae         | Sphingomonas           | (slash calls)         | 2450 |
| 10 | Proteobacteria | Gammaproteobacteria | Salinisphaerales | Salinisphaeraceae         | (family level ID only) |                       | 23   |
| 11 | Proteobacteria | Alphaproteobacteria | Caulobacterales  | Caulobacteraceae          | (family level ID only) |                       | 16   |
| 11 | Proteobacteria | Alphaproteobacteria | Caulobacterales  | Caulobacteraceae          | Phenyllobacterium      | (genus level ID only) | 938  |
| 11 | Proteobacteria | Alphaproteobacteria | Rhizobiales      | Bradyrhizobiaceae         | (slash calls)          |                       | 275  |
| 11 | Proteobacteria | Alphaproteobacteria | Rhizobiales      | Methylobacteriaceae       | Methylobacterium       | (slash calls)         | 11   |
| 11 | Proteobacteria | Alphaproteobacteria | Rhizobiales      | Phyllobacteriaceae        | Phyllobacterium        | (slash calls)         | 10   |
| 11 | Proteobacteria | Alphaproteobacteria | Sphingomonadales | Sphingomonadaceae         | Sphingomonas           | (slash calls)         | 1519 |
| 11 | Proteobacteria | Gammaproteobacteria | Pseudomonadales  | Moraxellaceae             | Acinetobacter          | ursingii              | 21   |
| 12 | Firmicutes     | Bacilli             | Bacillales       | Staphylococcaceae         | Staphylococcus         | (slash calls)         | 22   |
| 12 | Proteobacteria | Alphaproteobacteria | Caulobacterales  | Caulobacteraceae          | Phenyllobacterium      | (genus level ID only) | 496  |
| 12 | Proteobacteria | Alphaproteobacteria | Rhizobiales      | Bradyrhizobiaceae         | (slash calls)          |                       | 186  |
| 12 | Proteobacteria | Alphaproteobacteria | Rhizobiales      | Methylobacteriaceae       | Methylobacterium       | (slash calls)         | 34   |
| 12 | Proteobacteria | Alphaproteobacteria | Rhizobiales      | Phyllobacteriaceae        | Phyllobacterium        | (slash calls)         | 13   |
| 12 | Proteobacteria | Alphaproteobacteria | Sphingomonadales | Sphingomonadaceae         | Sphingomonas           | (slash calls)         | 1528 |
| 13 | Proteobacteria | Alphaproteobacteria | Caulobacterales  | Caulobacteraceae          | Phenyllobacterium      | (genus level ID only) | 972  |
| 13 | Proteobacteria | Alphaproteobacteria | Rhizobiales      | Bradyrhizobiaceae         | (slash calls)          |                       | 831  |
| 13 | Proteobacteria | Alphaproteobacteria | Rhizobiales      | Bradyrhizobiaceae         | Bradyrhizobium         | cytisi                | 15   |
| 13 | Proteobacteria | Alphaproteobacteria | Rhizobiales      | Methylobacteriaceae       | Methylobacterium       | (slash calls)         | 10   |
| 13 | Proteobacteria | Alphaproteobacteria | Rhizobiales      | Phyllobacteriaceae        | Phyllobacterium        | (slash calls)         | 156  |
| 13 | Proteobacteria | Alphaproteobacteria | Sphingomonadales | Sphingomonadaceae         | Sphingomonas           | (slash calls)         | 1099 |
| 14 | Firmicutes     | Bacilli             | Bacillales       | Bacillales incertae sedis | Gemella                | (slash calls)         | 12   |
| 14 | Firmicutes     | Bacilli             | Lactobacillales  | Streptococcaceae          | Streptococcus          | (slash calls)         | 11   |
| 14 | Proteobacteria | Alphaproteobacteria | Caulobacterales  | Caulobacteraceae          | (family level ID only) |                       | 19   |
| 14 | Proteobacteria | Alphaproteobacteria | Caulobacterales  | Caulobacteraceae          | Phenyllobacterium      | (genus level ID only) | 1071 |
| 14 | Proteobacteria | Alphaproteobacteria | Rhizobiales      | Bradyrhizobiaceae         | (slash calls)          |                       | 273  |
| 14 | Proteobacteria | Alphaproteobacteria | Rhizobiales      | Phyllobacteriaceae        | Phyllobacterium        | (slash calls)         | 77   |
| 14 | Proteobacteria | Alphaproteobacteria | Sphingomonadales | Sphingomonadaceae         | Sphingomonas           | (slash calls)         | 2531 |
| 15 | Proteobacteria | Alphaproteobacteria | Caulobacterales  | Caulobacteraceae          | Phenyllobacterium      | (genus level ID only) | 757  |
| 15 | Proteobacteria | Alphaproteobacteria | Rhizobiales      | Bradyrhizobiaceae         | (slash calls)          |                       | 138  |
| 15 | Proteobacteria | Alphaproteobacteria | Rhizobiales      | Methylobacteriaceae       | Methylobacterium       | (slash calls)         | 56   |
| 15 | Proteobacteria | Alphaproteobacteria | Rhizobiales      | Phyllobacteriaceae        | Phyllobacterium        | (slash calls)         | 64   |
| 15 | Proteobacteria | Alphaproteobacteria | Sphingomonadales | Sphingomonadaceae         | Sphingomonas           | (slash calls)         | 1832 |
| 15 | Proteobacteria | Gammaproteobacteria | Salinisphaerales | Salinisphaeraceae         | (family level ID only) |                       | 22   |
| 16 | Proteobacteria | Alphaproteobacteria | Caulobacterales  | Caulobacteraceae          | Phenyllobacterium      | (genus level ID only) | 510  |
| 16 | Proteobacteria | Alphaproteobacteria | Rhizobiales      | Bradyrhizobiaceae         | (slash calls)          |                       | 179  |
| 16 | Proteobacteria | Alphaproteobacteria | Rhizobiales      | Phyllobacteriaceae        | Phyllobacterium        | (slash calls)         | 62   |
| 16 | Proteobacteria | Alphaproteobacteria | Sphingomonadales | Sphingomonadaceae         | Sphingomonas           | (slash calls)         | 1328 |
| 17 | Proteobacteria | Alphaproteobacteria | Caulobacterales  | Caulobacteraceae          | Phenyllobacterium      | (genus level ID only) | 172  |
| 17 | Proteobacteria | Alphaproteobacteria | Rhizobiales      | Bradyrhizobiaceae         | (slash calls)          |                       | 21   |
| 17 | Proteobacteria | Alphaproteobacteria | Sphingomonadales | Sphingomonadaceae         | Sphingomonas           | (slash calls)         | 369  |
| 18 | Proteobacteria | Alphaproteobacteria | Sphingomonadales | Sphingomonadaceae         | Sphingomonas           | (slash calls)         | 31   |
| 19 | Proteobacteria | Alphaproteobacteria | Caulobacterales  | Caulobacteraceae          | Phenyllobacterium      | (genus level ID only) | 69   |
| 19 | Proteobacteria | Alphaproteobacteria | Rhizobiales      | Bradyrhizobiaceae         | (slash calls)          |                       | 22   |
| 19 | Proteobacteria | Alphaproteobacteria | Sphingomonadales | Sphingomonadaceae         | Sphingomonas           | (slash calls)         | 236  |
| 20 | Proteobacteria | Alphaproteobacteria | Caulobacterales  | Caulobacteraceae          | (family level ID only) |                       | 18   |
| 20 | Proteobacteria | Alphaproteobacteria | Caulobacterales  | Caulobacteraceae          | Phenyllobacterium      | (genus level ID only) | 921  |
| 20 | Proteobacteria | Alphaproteobacteria | Rhizobiales      | Bradyrhizobiaceae         | (slash calls)          |                       | 122  |
| 20 | Proteobacteria | Alphaproteobacteria | Rhizobiales      | Methylobacteriaceae       | Methylobacterium       | (slash calls)         | 25   |
| 20 | Proteobacteria | Alphaproteobacteria | Rhizobiales      | Phyllobacteriaceae        | Phyllobacterium        | (slash calls)         | 77   |
| 20 | Proteobacteria | Alphaproteobacteria | Sphingomonadales | Sphingomonadaceae         | Sphingomonas           | (slash calls)         | 1818 |
| 21 | Proteobacteria | Alphaproteobacteria | Caulobacterales  | Caulobacteraceae          | Phenyllobacterium      | (genus level ID only) | 231  |
| 21 | Proteobacteria | Alphaproteobacteria | Rhizobiales      | Bradyrhizobiaceae         | (slash calls)          |                       | 74   |
| 21 | Proteobacteria | Alphaproteobacteria | Rhizobiales      | Phyllobacteriaceae        | Phyllobacterium        | (slash calls)         | 20   |
| 21 | Proteobacteria | Alphaproteobacteria | Sphingomonadales | Sphingomonadaceae         | Sphingomonas           | (slash calls)         | 533  |
| 22 | Actinobacteria | Actinobacteria      | Actinomycetales  | Corynebacteriaceae        | Corynebacterium        | imitans               | 149  |
| 22 | Proteobacteria | Alphaproteobacteria | Caulobacterales  | Caulobacteraceae          | Phenyllobacterium      | (genus level ID only) | 168  |
| 22 | Proteobacteria | Alphaproteobacteria | Rhizobiales      | Bradyrhizobiaceae         | (slash calls)          |                       | 39   |
| 22 | Proteobacteria | Alphaproteobacteria | Rhizobiales      | Methylobacteriaceae       | Methylobacterium       | (slash calls)         | 11   |
| 22 | Proteobacteria | Alphaproteobacteria | Sphingomonadales | Sphingomonadaceae         | Sphingomonas           | (slash calls)         | 439  |
