# Supplementary material for: Sphingomonas and Phenylobacterium as Major Microbiota in Thymic Epithelial Tumors
Source: MDPI journal article supplement (doi:10.3390/jpm11111092), 2021-10-26
Supplement: s1 [file s1]

Supplementary Figure 1.

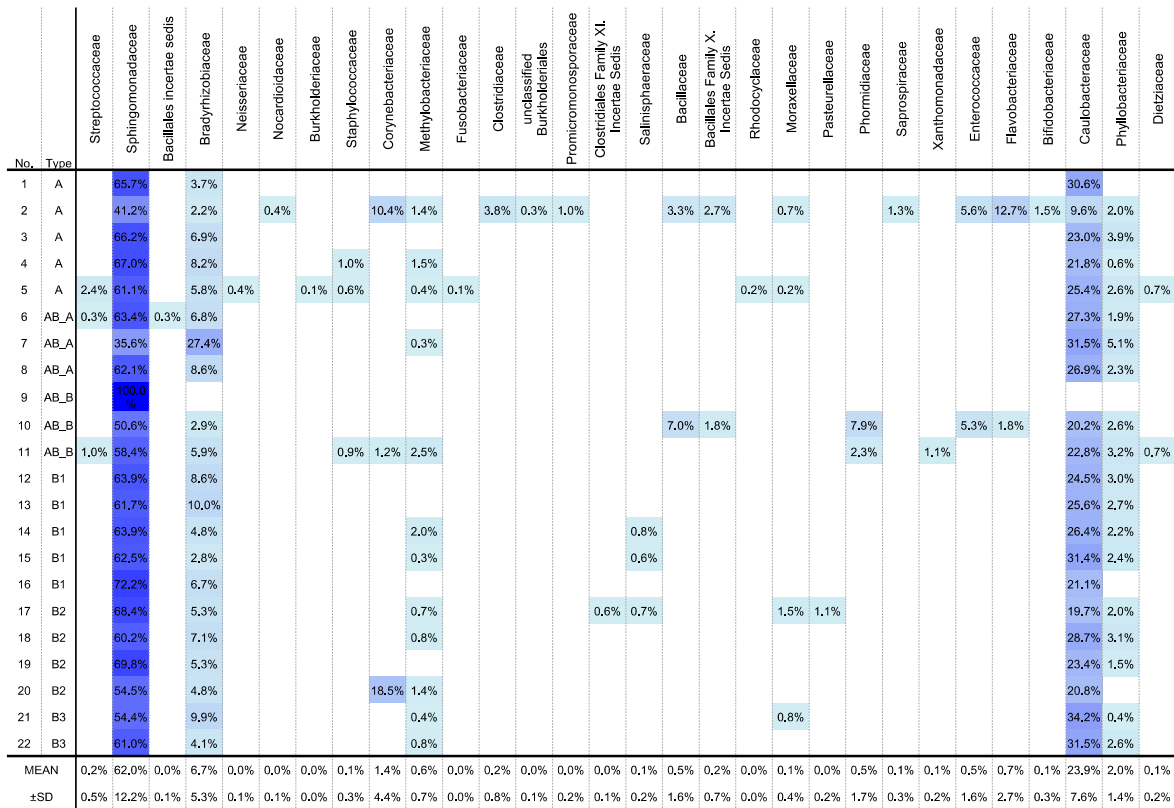

Composition and abundance of dominant families in all samples. The abundance values of the detected families are presented using a heatmap.
