# Supplementary material for: Sphingomonas and Phenylobacterium as Major Microbiota in Thymic Epithelial Tumors
Source: MDPI journal article supplement (doi:10.3390/jpm11111092), 2021-10-26
Supplement: s1 [file s1]

Supplementary Figure 2.

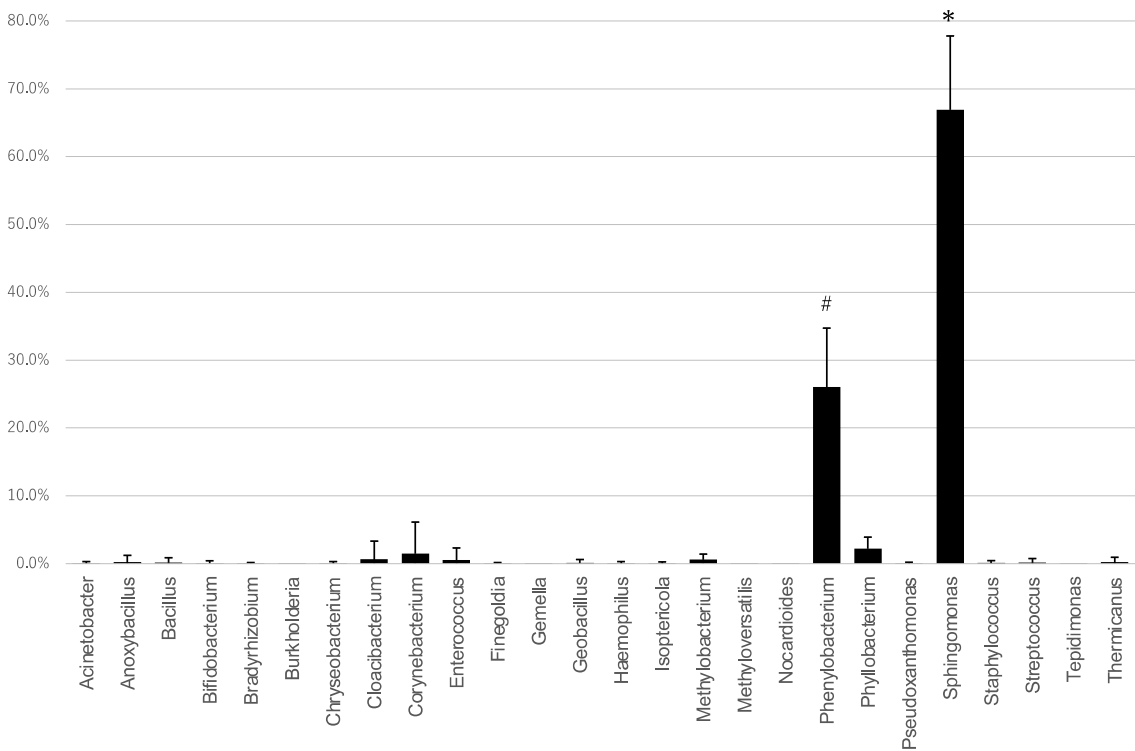

Comparison of abundance of detected genera. *Sphingomonas* and *Phenylobacterium* were significantly more abundant than the others. \* $p < 0.05$  compared to the other genera, # $p < 0.05$  compared to the other genera except *Sphingomonas*.
