# Supplementary material for: Sphingomonas and Phenylobacterium as Major Microbiota in Thymic Epithelial Tumors
Source: MDPI journal article supplement (doi:10.3390/jpm11111092), 2021-10-26
Supplement: s1 [file s1]

**Supplementary Table 1.** Characteristics of the patients with pancreatic cancer.

| Parameter                  |                          | Number of patients | Overall percentage |
|----------------------------|--------------------------|--------------------|--------------------|
| Total number               |                          | 30                 |                    |
| Age, median (range)        |                          | 74 (49–86)         |                    |
| Sex                        |                          |                    |                    |
|                            | Male                     | 13                 | 43.3%              |
|                            | Female                   | 17                 | 56.7%              |
| Stage                      |                          |                    |                    |
|                            | I                        | 6                  | 20.0%              |
|                            | II                       | 12                 | 40.0%              |
|                            | III                      | 3                  | 10.0%              |
|                            | IV                       | 9                  | 30.0%              |
| Smoking Status (Pack year) |                          |                    |                    |
|                            | 0                        | 15                 | 50.0%              |
|                            | 0<PY≤30                  | 9                  | 30.0%              |
|                            | >30                      | 6                  | 20.0%              |
| Pathology                  |                          |                    |                    |
|                            | IDC (Adenocarcinoma)     | 29                 | 96.7%              |
|                            | IDC (Mucinous carcinoma) | 1                  | 3.3%               |

IDC, invasive ductal carcinoma.
